# Supplementary material for: A novel biosensor based on ball-flower-like Cu-hemin MOF grown on elastic carbon foam for trichlorfon detection
Source: Royal Society of Chemistry journal article supplement (doi:10.1039/c8ra04596h), 2018-01-01
Supplement: c8ra04596h1.pdf [file c8ra04596h1.pdf]

## Supplementary Information

# **A novel biosensor based on ball-flower-like Cu-hemin MOF grown on elastic carbon foam for trichlorfon detection**

Yonggui Song, Baixi Shan, Bingwei Feng, Pengfei Xu, Qiang Zeng, Dan Su\*

*Jiangxi University of Chinese Traditional Medicine, 1688 Meiling Road, Nanchang 330006, China.*

---

\*Corresponding author: Tel/Fax: +86 791 87802135. E-mail: sud94@aliyun.com (D. Su).

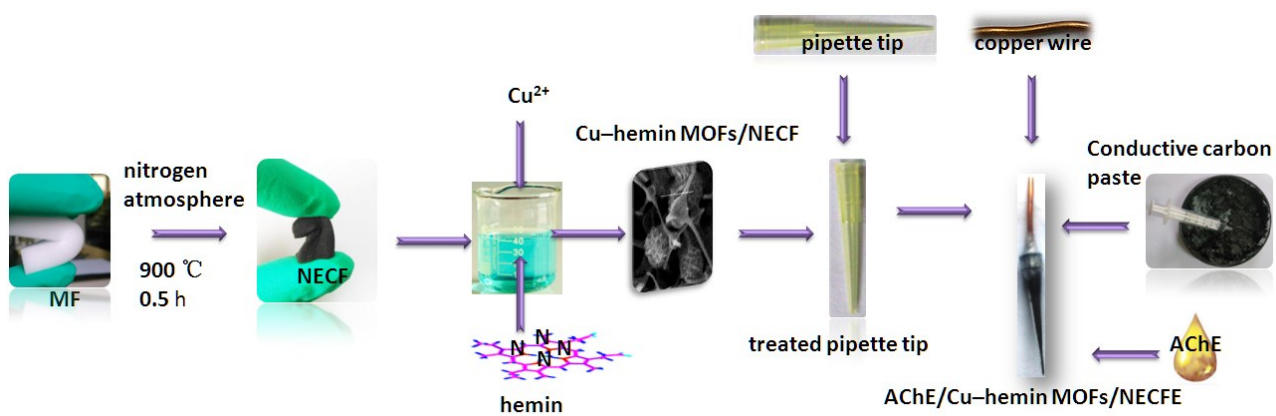

**Fig. S1.** Schematic illustration of the fabrication of the integrated AChE/Cu-hemin MOFs/NECFE.

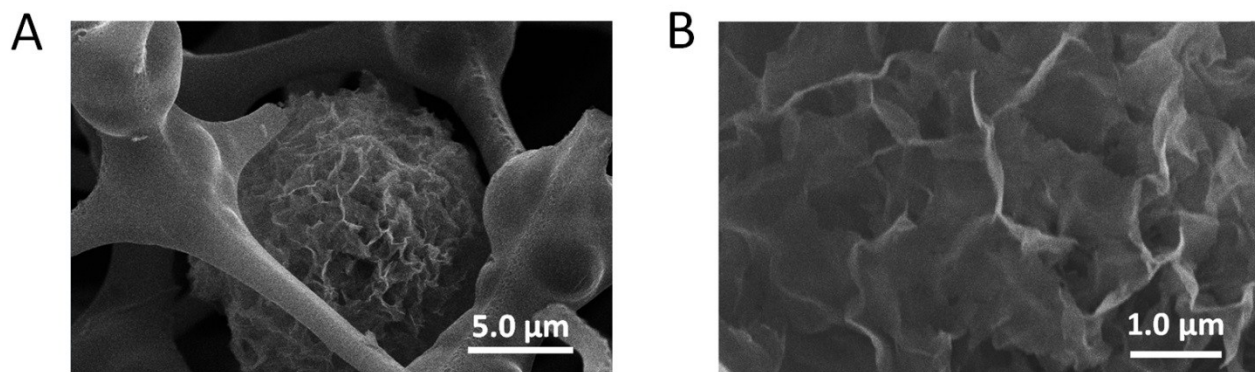

**Fig. S2.** A SEM image of Cu-hemin MOFs/NECF, B Detailed structure of Cu-hemin MOFs/NECF.

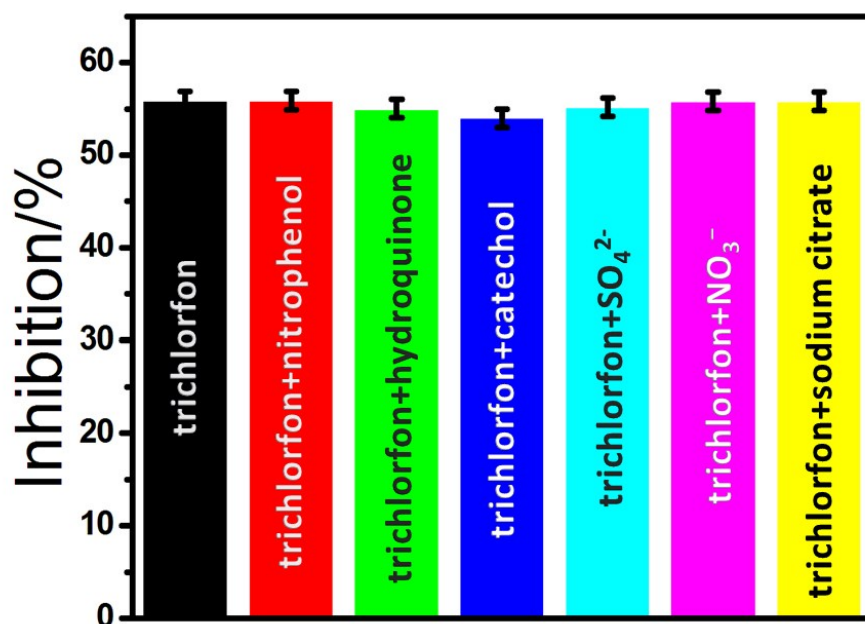

**Fig. S3.** Comparison of the percentage of the inhibition of the AChE/Cu-hemin MOFs/NECFE in 0.1 M pH 7.0 PBS with 1.0 mM ATCl in the presence of trichlorfon and other interfering substances.

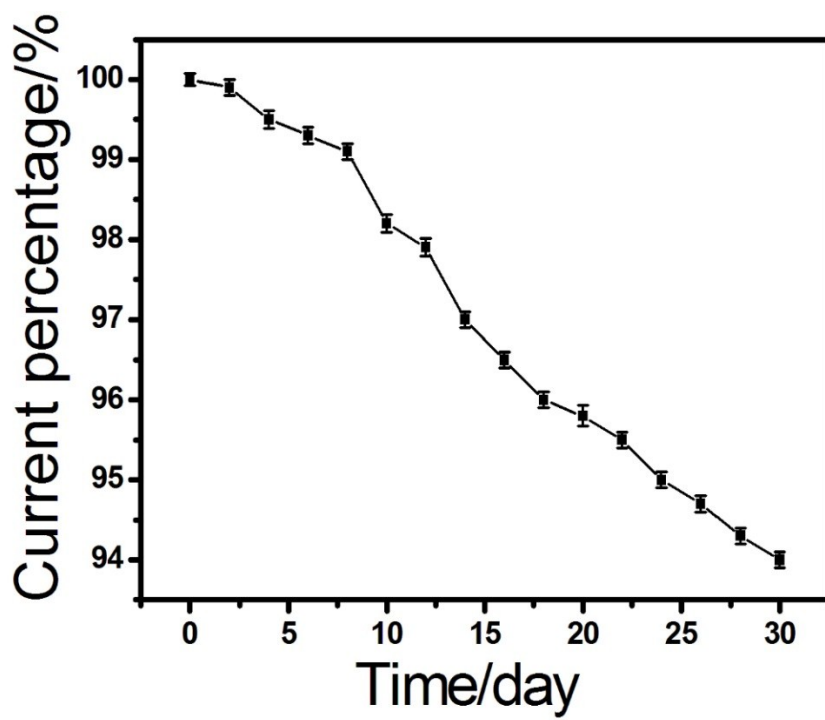

**Fig. S4.** Stability test of the AChE/Cu-hemin MOFs/NECFE in 30 days.

**Table S1.** Recovery studies of trichlorfon in tomato samples. (Each result was estimated by six determinations)

| Sample | Taken<br>(ng mL <sup>-1</sup> ) | Found<br>(ng mL <sup>-1</sup> ) | Recovery<br>(%) | RSD<br>(%) |
|--------|---------------------------------|---------------------------------|-----------------|------------|
| 1      | 0.80                            | 0.775                           | 96.9            | 3.2        |
| 2      | 1.50                            | 1.46                            | 97.6            | 3.8        |
| 3      | 2.50                            | 2.65                            | 106             | 3.5        |
| 4      | 4.50                            | 4.59                            | 102             | 3.0        |
| 5      | 15.0                            | 15.4                            | 103             | 3.9        |
